# Supplementary material for: Quantum Computational Investigation of (E)-1-(4-methoxyphenyl)-5-methyl-N′-(3-phenoxybenzylidene)-1H-1,2,3-triazole-4-carbohydrazide
Source: MDPI journal article supplement (doi:10.3390/molecules27072193), 2022-03-28
Supplement: s1 [file s1]

## Article

# Quantum Computational Investigation of (*E*)-1-(4-Methoxyphenyl)-5-methyl-*N'*-(3-phenoxybenzylidene)-1*H*-1,2,3-triazole-4-carbohydrazide

Halil Gökce <sup>1,\*</sup>, Fatih Şen <sup>2</sup>, Yusuf Sert <sup>2,3</sup>, Bakr F. Abdel-Wahab <sup>4</sup>, Benson M. Kariuki <sup>5</sup> and Gamal A. El-Hiti <sup>6,\*</sup>

<sup>1</sup> Vocational School of Health Services, Giresun University, 28200, Giresun, Turkey

<sup>2</sup> Sorgun Vocational School, Bozok University, 66700, Yozgat, Turkey; fatihsen55@gmail.com

<sup>3</sup> Department of Physics, Faculty of Art & Science, Bozok University, 66900, Yozgat, Turkey; yusufsert1984@gmail.com

<sup>4</sup> Applied Organic Chemistry Department, National Research Centre, Dokki, Giza 12622, Egypt; bakrfatehy@yahoo.com

<sup>5</sup> School of Chemistry, Cardiff University, Main Building, Park Place, Cardiff, CF10 3AT, UK; kariukib@cardiff.ac.uk

<sup>6</sup> Department of Optometry, College of Applied Medical Sciences, King Saud University, Riyadh 11433, Saudi Arabia

\* Correspondence: Correspondence: halil.gokce@giresun.edu.tr (H.G.); gelhiti@ksu.edu.sa (G.A.E.-H.); Tel.: +966-11469-3778 (G.A.E.-H.); Fax: +966-11469-3536 (G.A.E.-H.)

Table S3. Observed and calculated IR vibrational frequencies of 2.

| Vib. no. | FTIR              | B3LYP | Assignment <sup>a</sup>                                                             | Intensity |
|----------|-------------------|-------|-------------------------------------------------------------------------------------|-----------|
| V1       | 3316              | 3336  | vNH(100) in the N46—H47 carbohydrazide group                                        | 27.83     |
| V2       |                   | 3091  | vCH(92) in the aromatic ring                                                        | 4.55      |
| V3       |                   | 3085  | vCH(94) in the aromatic ring                                                        | 0.49      |
| V4       |                   | 3084  | vCH(83) in the aromatic ring                                                        | 3.76      |
| V5       |                   | 3076  | vCH(92) in the aromatic ring                                                        | 3.74      |
| V6       |                   | 3074  | vCH(90) in the aromatic ring                                                        | 1.73      |
| V7       |                   | 3072  | vCH(91) in the aromatic ring                                                        | 7.83      |
| V8       | 3067              | 3071  | vCH(82) in the aromatic ring                                                        | 0.17      |
| V9       |                   | 3069  | vCH(92) in the aromatic ring                                                        | 9.74      |
| V10      |                   | 3064  | vCH(83) in the aromatic ring                                                        | 25.74     |
| V11      |                   | 3058  | vCH(92) in the aromatic ring                                                        | 18.91     |
| V12      |                   | 3051  | vCH(88) in the aromatic ring                                                        | 9.77      |
| V13      |                   | 3043  | vCH(94) in the aromatic ring                                                        | 2.27      |
| V14      |                   | 3043  | vCH(90) in the aromatic ring                                                        | 4.81      |
| V15      |                   | 3023  | vCH <sub>3</sub> (84) in the aliphatic group asym. mode                             | 0.08      |
| V16      |                   | 3019  | vCH <sub>3</sub> (99) in the aliphatic group asym. mode                             | 20.76     |
| V17      | 2962              | 2972  | vCH <sub>3</sub> (93) in the aliphatic group asym. mode                             | 8.01      |
| V18      |                   | 2952  | vCH <sub>3</sub> (99) in the aliphatic group asym. mode                             | 32.87     |
| V19      | 2908              | 2918  | vCH <sub>3</sub> (99) in the aliphatic group sym. mode                              | 16.64     |
| V20      | 2837              | 2907  | vCH(100) in the C22—H23 carbohydrazide group                                        | 53.21     |
| V21      | 2837              | 2893  | vCH <sub>3</sub> (99) in the aliphatic group sym. mode                              | 57.31     |
| V22      | 1686              | 1684  | vOC(82) in the C24=O52 carbohydrazide group                                         | 296.72    |
| V23      | 1612              | 1606  | vNC(61) in the N45=C22 carbohydrazide group                                         | 2.02      |
| V24      |                   | 1588  | vCC(52) in the aromatic ring                                                        | 49.05     |
| V25      |                   | 1582  | vCC(22) in the aromatic ring                                                        | 3.25      |
| V26      | 1589, 1577, 1564, | 1570  | vCC(41) in the aromatic ring                                                        | 57.63     |
| V27      |                   | 1565  | vCC(47) in the aromatic ring + $\delta$ CCC(22)                                     | 11.47     |
| V28      |                   | 1560  | vCC(56) in the aromatic ring                                                        | 61.81     |
| V29      |                   | 1549  | vCC(36) in the aromatic ring                                                        | 104.08    |
| V30      |                   | 1538  | $\delta$ CNN(35) + vCC(29) in the C25=C26                                           | 293.57    |
| V31      | 1512              | 1501  | $\delta$ HNN(52)                                                                    | 366.64    |
| V32      | 1489              | 1487  | $\delta$ HCC(46) + $\delta$ CCC(13) + vNC(10) in the triazole ring                  | 446.87    |
| V33      |                   | 1461  | $\delta$ HCC(33) + $\delta$ CCC(12)                                                 | 121.44    |
| V34      |                   | 1451  | $\delta$ HCC(59)                                                                    | 143.39    |
| V35      |                   | 1447  | $\delta$ HCH(46) + $\tau$ HCCN(12)                                                  | 24.70     |
| V36      |                   | 1445  | $\delta$ HCH(72) + $\tau$ HCOC(17)                                                  | 46.28     |
| V37      | 1473              | 1438  | $\delta$ HCH(76) + $\tau$ HCOC(23)                                                  | 10.04     |
| V38      |                   | 1428  | $\delta$ HCC(46) + vCC(11) in the aromatic ring                                     | 14.51     |
| V39      |                   | 1420  | $\delta$ HCH(81)                                                                    | 24.50     |
| V40      |                   | 1416  | $\delta$ HCH(56) + $\delta$ CCC(15) + $\tau$ HCCN(10)                               | 47.39     |
| V41      |                   | 1415  | $\delta$ HCH(40) + $\delta$ CCC(10) + $\tau$ HCCN(10)                               | 62.03     |
| V42      |                   |       | $\delta$ HCH(44) + vNC(20) in the triazole ring + $\delta$ CCC(14)+ $\tau$ HCCN(10) | 12.68     |
| V43      |                   | 1402  |                                                                                     |           |
| V43      | 1365              | 1385  | vNC(21) in the triazole ring + $\delta$ HCC(11)                                     | 51.15     |
| V44      |                   | 1368  | $\delta$ HCH(83)                                                                    | 5.14      |
| V45      | 1346              | 1344  | $\delta$ HCH(31) + vNN(15) in the triazole ring                                     | 91.01     |
| V46      | 1311              | 1328  | $\delta$ HCH(27) + vNN(24) in the triazole ring                                     | 32.77     |
| V47      |                   | 1299  | vCC(42) in the aromatic ring + $\delta$ HCC(15)                                     | 1.17      |
| V48      | 1303              | 1297  | vCC(40) in the aromatic ring + $\delta$ HCC(10)                                     | 12.67     |

|     |      |      |                                                             |        |
|-----|------|------|-------------------------------------------------------------|--------|
| V49 |      | 1291 | vCC(68) in the aromatic ring                                | 23.85  |
| V50 | 1279 |      | vNN(37) in the triazole ring + vNC(11) in the triazole +    | 18.01  |
| V51 |      | 1284 | δCNN(11)                                                    |        |
| V52 | 1279 | 1278 | δHCC(83)                                                    | 8.41   |
| V53 |      | 1274 | vCC(34) in the aromatic ring + δHCC(16)                     | 2.70   |
| V54 |      | 1249 | δHCC(35)                                                    | 81.38  |
| V55 | 1213 | 1230 | vOC(41) in the methoxy group + vCC(10) in the aromatic ring | 273.43 |
|     |      |      | vOC(24) in the C12—O51 + δHCN(14) + vCC(13) in the aro-     | 405.87 |
|     |      | 1223 | matic ring                                                  |        |
| V56 |      | 1211 | vNC(47) in the N48-C25/N46—C24 + vCC(12) in the C24—C25     | 91.87  |
| V57 | 1183 | 1197 | vOC(27) in the O51—C1                                       | 161.05 |
| V58 |      | 1183 | vNC(20) in the N48—C25/N46—C24                              | 326.66 |
| V59 | 1163 | 1157 | τHCOC(50) + δHCH(22)                                        | 8.40   |
| V60 |      | 1149 | δHCC(35)                                                    | 10.31  |
| V61 | 1147 | 1146 | δHCC(52)                                                    | 9.64   |
| V62 |      | 1140 | δHCC(54)                                                    | 23.28  |
| V63 |      | 1134 | δHCC(68)                                                    | 4.35   |
| V64 | 1116 | 1129 | vNN(20) in the N45-N46 + δHCC(14)                           | 193.69 |
| V65 |      | 1124 | τHCOC(75) + δHCH(24)                                        | 0.65   |
| V66 |      | 1107 | vNN(10) in the N45—N46                                      | 208.60 |
| V67 | 1088 | 1092 | δHCC(45) + vCC(25) in the aromatic phenyl                   | 12.19  |
| V68 | 1071 | 1067 | δHCC(27) + vCC(23) in the aromatic phenyl                   | 52.94  |
| V69 | 1035 | 1055 | vNN(25) in the N49—N50 + τHCCN(10)                          | 8.97   |
| V70 |      | 1053 | vNC(14) in the N48-C25/N46—C24                              | 16.14  |
| V71 |      | 1041 | τHCCN(49) + δHCH(12)                                        | 6.88   |
| V72 | 1020 | 1022 | τHCCN(42) + δHCH(12)                                        | 9.95   |
| V73 |      | 1015 | vOC(52) in the O53—C41                                      | 41.17  |
| V74 | 1001 | 1003 | vCC(33) in the phenyl + δHCC(12) + δCCC(11)                 | 9.48   |
| V75 |      | 1000 | vCC(29) in the phenyl + vNN(10) in the N49—N50              | 23.27  |
| V76 |      | 978  | δCCC(50) + vNN(12) in the N49—N50                           | 8.54   |
| V77 | 976  | 977  | δCCC(55)                                                    | 1.58   |
| V78 |      | 973  | δCCC(53)                                                    | 1.62   |
| V79 |      | 959  | δCCC(10)                                                    | 50.54  |
| V80 | 964  | 956  | τHCCC(74) + δNNN(26)                                        | 4.63   |
| V81 |      | 955  | τHCCC(70) + δNNN(12)                                        | 86.23  |
| V82 |      | 943  | τHCCC(64) + τCCCC(13)                                       | 0.19   |
| V83 |      | 941  | τHCCC(56)                                                   | 0.40   |
| V84 | 916  | 938  | τHCCC(72)                                                   | 0.24   |
| V85 |      | 925  | τHCNN(80)                                                   | 18.74  |
| V86 |      | 913  | τHCCC(67) + τCCCN(12)                                       | 0.43   |
| V87 |      | 889  | τHCCC(55) + τCCOC(18)                                       | 5.65   |
| V88 |      | 881  | τHCCC(58)                                                   | 42.46  |
| V89 |      | 877  | δOCN(20) + δNNC(11)                                         | 55.92  |
| V90 | 895  | 866  | τHCCC(79)                                                   | 0.51   |
| V91 |      | 819  | τHCCC(52) + γOCCC(19)                                       | 54.95  |
| V92 |      | 809  | τHCCC(34)                                                   | 30.46  |
| V93 |      | 806  | τHCCC(23)                                                   | 29.08  |
| V94 |      | 788  | δCCC(12)                                                    | 3.26   |
| V95 |      | 786  | τHCCC(79)                                                   | 4.97   |
| V96 |      | 771  | τHCCC(47)                                                   | 19.94  |
| V97 |      | 753  | τHCCC(26)                                                   | 37.65  |

|      |     |     |                                                                       |       |
|------|-----|-----|-----------------------------------------------------------------------|-------|
| V98  | 747 | 748 | $\gamma\text{ONCC}(63) + \gamma\text{CCNC}(16) + \tau\text{CNNN}(13)$ | 1.82  |
| V99  |     | 729 | $\tau\text{HCCC}(30)$                                                 | 30.42 |
| V100 | 718 | 708 | $\tau\text{HCCC}(33)$                                                 | 0.97  |
| V101 |     | 679 | $\tau\text{CNNN}(40) + \tau\text{HCCC}(32) + \tau\text{CCCC}(11)$     | 27.26 |
| V102 |     | 678 | $\tau\text{CNNN}(33) + \tau\text{HCCC}(27) + \tau\text{CCCC}(10)$     | 3.45  |
| V103 | 660 | 675 | $\delta\text{CNN}(12)$                                                | 1.75  |
| V104 |     | 673 | $\gamma\text{CCOC}(20) + \tau\text{HCCC}(16)$                         | 28.96 |
| V105 | 650 | 643 | $\tau\text{CNNN}(35) + \gamma\text{ONCC}(14)$                         | 0.12  |
| V106 | 650 | 635 | $\delta\text{CCC}(15)$                                                | 1.99  |
| V107 |     | 629 | $\tau\text{CCCC}(22) + \delta\text{COC}(12)$                          | 0.49  |
| V108 |     | 615 | $\tau\text{CCCC}(20) + \delta\text{COC}(10)$                          | 8.07  |
| V109 | 625 | 611 | $\delta\text{CCC}(21)$                                                | 32.36 |
| V110 |     | 605 | $\delta\text{CCC}(82)$                                                | 2.25  |
| V111 | 592 | 590 | $\tau\text{HNNC}(85)$                                                 | 59.80 |
| V112 | 574 | 565 | $\delta\text{CCC}(43) + \delta\text{CCO}(10)$                         | 4.40  |
| V113 |     | 558 | $\delta\text{CNN}(13)$                                                | 5.33  |
| V114 | 540 | 554 | $\tau\text{CCCC}(24) + \delta\text{COC}(13)$                          | 6.37  |
| V115 | 520 | 510 | $\gamma\text{OCCC}(17) + \gamma\text{CNCC}(15)$                       | 9.13  |
| V116 | 496 | 487 | $\delta\text{CCN}(13)$                                                | 4.68  |
| V117 |     | 478 | $\tau\text{CCOC}(26)$                                                 | 9.81  |
| V118 | 478 | 473 | $\tau\text{CCOC}(21)$                                                 | 3.99  |
| V119 | 457 | 445 | $\tau\text{CCCC}(28) + \gamma\text{CCOC}(19)$                         | 5.38  |
| V120 | 433 | 422 | $\delta\text{OCN}(12) + \tau\text{CCCN}(12)$                          | 6.89  |
| V121 | 412 | 413 | $\tau\text{CCCN}(36) + \tau\text{HCCC}(10)$                           | 0.23  |
| V122 |     | 408 | $\tau\text{CCCN}(30) + \tau\text{HCCC}(11)$                           | 6.04  |
| V123 | 401 | 407 | $\tau\text{CCCN}(28) + \tau\text{HCCC}(10)$                           | 0.73  |
| V124 |     | 393 | $\delta\text{CCN}(16) + \gamma\text{CCNN}(11) + \tau\text{CCCN}(10)$  | 1.26  |
| V125 |     | 368 | $\delta\text{CCO}(26)$                                                | 6.09  |
| V126 |     | 342 | $\delta\text{CCC}(14)$                                                | 7.96  |
| V127 |     | 312 | $\tau\text{CCNN}(37) + \tau\text{CCCC}(28)$                           | 0.18  |
| V128 |     | 293 | $\delta\text{CCO}(16)$                                                | 0.29  |
| V129 |     | 271 | $\gamma\text{CNCC}(22)$                                               | 0.59  |
| V130 |     | 259 | $\gamma\text{CNCC}(22)$                                               | 3.08  |
| V131 |     | 242 | $\delta\text{CCO}(18) + \delta\text{OCC}(18)$                         | 15.11 |
| V132 |     | 240 | $\tau\text{HCOC}(28)$                                                 | 3.98  |
| V133 |     | 237 | $\tau\text{HCOC}(14)$                                                 | 2.78  |
| V134 |     | 224 | $\tau\text{CCOC}(19) + \delta\text{COC}(10)$                          | 2.28  |
| V135 |     | 211 | $\delta\text{CCC}(11)$                                                | 18.46 |
| V136 |     | 198 | $\tau\text{COCC}(21) + \tau\text{CNNC}(11)$                           | 7.64  |
| V137 |     | 193 | $\tau\text{COCC}(24) + \tau\text{CNNC}(10)$                           | 0.44  |
| V138 |     | 177 | $\tau\text{COCC}(22) + \tau\text{CNNC}(13)$                           | 4.11  |
| V139 |     | 147 | $\tau\text{COCC}(21) + \tau\text{CNNC}(11)$                           | 2.56  |
| V140 |     | 121 | $\tau\text{CCCC}(24) + \tau\text{CNNC}(22)$                           | 0.63  |
| V141 |     | 109 | $\tau\text{HCCN}(70)$                                                 | 0.44  |
| V142 |     | 102 | $\tau\text{COCC}(43)$                                                 | 4.07  |
| V143 |     | 84  | $\tau\text{COCC}(38)$                                                 | 0.46  |
| V144 |     | 79  | $\delta\text{NCC}(12) + \delta\text{CCN}(10)$                         | 2.95  |
| V145 |     | 61  | $\delta\text{NCC}(11) + \delta\text{CCN}(10)$                         | 7.10  |
| V146 |     | 54  | $\delta\text{NCC}(10) + \delta\text{CCN}(10)$                         | 0.17  |
| V147 |     | 44  | $\tau\text{CCCN}(14)$                                                 | 0.19  |
| V148 |     | 39  | $\tau\text{CCCN}(10)$                                                 | 0.96  |

---

|      |    |                                              |      |
|------|----|----------------------------------------------|------|
| V149 | 33 | $\tau\text{CCOC}(37)$                        | 0.74 |
| V150 | 23 | $\delta\text{CCN}(13) + \tau\text{CCCN}(11)$ | 1.02 |
| V151 | 16 | $\delta\text{CCN}(11) + \tau\text{CCCN}(10)$ | 1.79 |
| V152 | 13 | $\delta\text{CCN}(13) + \tau\text{CCCN}(11)$ | 0.30 |
| V153 | 9  | $\delta\text{CCN}(12) + \tau\text{CCCN}(10)$ | 0.48 |

---

<sup>a</sup> Assignments are made based on the results B3LYP and potential energy distribution (PED), less than 10% are not shown.  $R^2$  values were computed as 0.9079 for IR wavenumber.  $\nu$ , stretching;  $\delta$ , in-plane bending;  $\tau$ , torsion;  $\gamma$ , out-of-plane bending.
