# Supplementary material for: Quantum Computational Investigation of (E)-1-(4-methoxyphenyl)-5-methyl-N′-(3-phenoxybenzylidene)-1H-1,2,3-triazole-4-carbohydrazide
Source: MDPI journal article supplement (doi:10.3390/molecules27072193), 2022-03-28
Supplement: s1 [file s1]

VME6

03/08/2021 10:45:07

%T

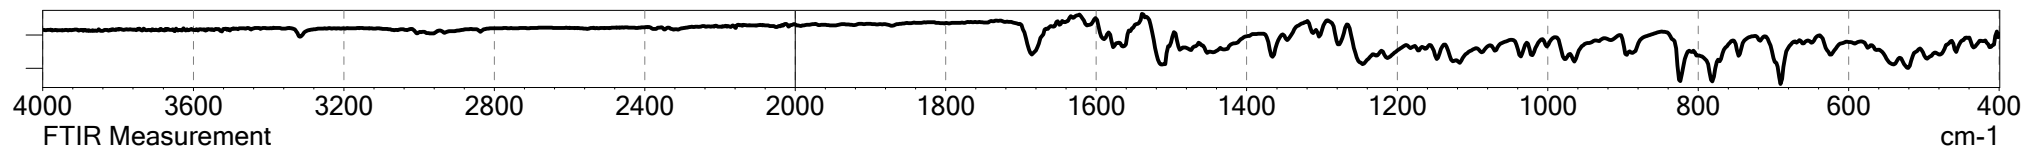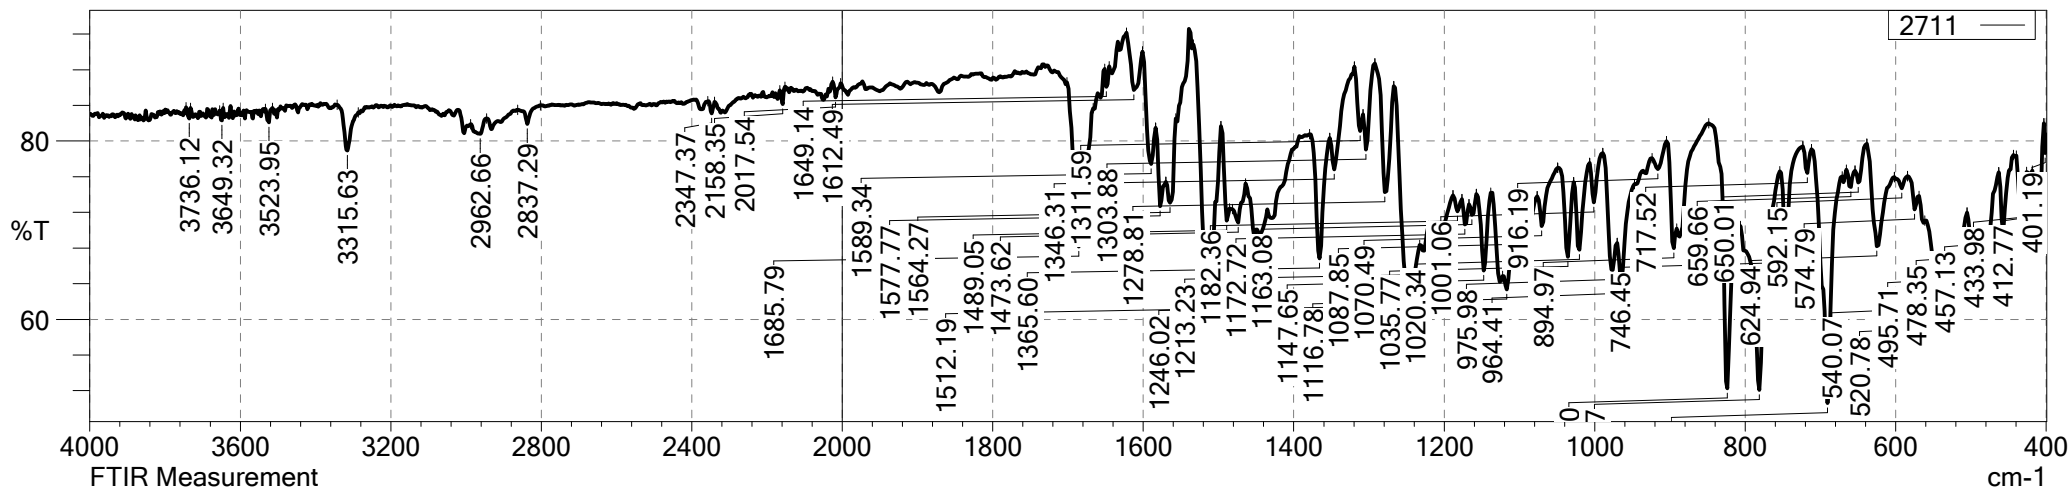

| Item               | Value                                         | No. | Peak   | Intensity | Corr. Intensity | Base (H) | Base (L) | Area    | Corr. Area | Comment |
|--------------------|-----------------------------------------------|-----|--------|-----------|-----------------|----------|----------|---------|------------|---------|
| Acquired Date&Time | 14/07/2021 11:05:33                           |     |        |           |                 |          |          |         |            |         |
| Acquired by        | System Administrator                          | 1   | 401.19 | 78.66     | 2.72            | 403.12   | 399.26   | 77.078  | 5.247      |         |
| Filename           | C:\Users\Shimadzu\Desktop\BK\140721\2711.ispd | 2   | 412.77 | 72.64     | 6.03            | 418.55   | 403.12   | 381.840 | 63.042     |         |
| Spectrum name      | 2711                                          | 3   | 433.98 | 72.52     | 5.06            | 439.77   | 426.27   | 343.730 | 39.233     |         |
| Sample name        | gb                                            | 4   | 457.13 | 69.75     | 7.34            | 462.92   | 443.63   | 487.093 | 52.537     |         |
| Sample ID          | 271                                           | 5   | 478.35 | 68.20     | 3.58            | 486.06   | 462.92   | 659.510 | 33.750     |         |
| Option             |                                               | 6   | 495.71 | 65.72     | 4.97            | 505.35   | 486.06   | 615.834 | 50.534     |         |
| Comment            | FTIR Measurement                              | 7   | 520.78 | 60.25     | 8.53            | 532.35   | 505.35   | 929.010 | 96.762     |         |
| No. of Scans       | 20                                            | 8   | 540.07 | 62.34     | 5.30            | 561.29   | 532.35   | 982.435 | 78.024     |         |
| Resolution         | 4 [cm-1]                                      | 9   | 574.79 | 72.35     | 2.34            | 584.43   | 569.00   | 396.202 | 9.914      |         |
| Apodization        | Happ-Genzel                                   | 10  | 592.15 | 74.68     | 1.34            | 601.79   | 584.43   | 425.203 | 8.816      |         |
|                    |                                               | 11  | 624.94 | 68.20     | 10.11           | 638.44   | 601.79   | 974.361 | 161.398    |         |
|                    |                                               | 12  | 650.01 | 75.36     | 2.07            | 653.87   | 638.44   | 349.000 | 12.415     |         |

VME6

03/08/2021 10:45:07

|    |         |       |       |         |         |          |         |  |
|----|---------|-------|-------|---------|---------|----------|---------|--|
| 13 | 659.66  | 74.85 | 1.89  | 665.44  | 653.87  | 279.436  | 10.239  |  |
| 14 | 690.52  | 50.63 | 26.85 | 711.73  | 671.23  | 1282.166 | 372.970 |  |
| 15 | 717.52  | 76.43 | 2.81  | 723.31  | 711.73  | 255.504  | 15.258  |  |
| 16 | 746.45  | 67.44 | 9.87  | 754.17  | 723.31  | 751.605  | 72.987  |  |
| 17 | 781.17  | 52.09 | 14.35 | 806.25  | 773.46  | 1204.233 | 149.420 |  |
| 18 | 823.60  | 52.28 | 21.92 | 848.68  | 812.03  | 1051.406 | 182.678 |  |
| 19 | 894.97  | 68.00 | 4.98  | 904.61  | 891.11  | 363.463  | 26.921  |  |
| 20 | 916.19  | 76.85 | 1.97  | 923.90  | 904.61  | 424.997  | 20.172  |  |
| 21 | 964.41  | 64.01 | 6.19  | 970.19  | 947.05  | 690.009  | 38.695  |  |
| 22 | 975.98  | 65.53 | 6.05  | 989.48  | 970.19  | 566.327  | 57.231  |  |
| 23 | 1001.06 | 73.12 | 4.79  | 1006.84 | 989.48  | 413.628  | 33.418  |  |
| 24 | 1020.34 | 67.80 | 8.36  | 1028.06 | 1006.84 | 571.821  | 72.333  |  |
| 25 | 1035.77 | 67.03 | 8.95  | 1049.28 | 1028.06 | 576.553  | 71.631  |  |
| 26 | 1070.49 | 70.46 | 4.03  | 1076.28 | 1049.28 | 695.603  | 31.576  |  |
| 27 | 1087.85 | 69.52 | 3.19  | 1095.57 | 1076.28 | 548.401  | 25.538  |  |
| 28 | 1116.78 | 63.36 | 3.03  | 1122.57 | 1095.57 | 867.604  | 15.068  |  |
| 29 | 1147.65 | 65.47 | 8.66  | 1157.29 | 1138.00 | 570.601  | 71.762  |  |
| 30 | 1163.08 | 71.72 | 1.65  | 1166.93 | 1157.29 | 264.676  | 8.955   |  |
| 31 | 1172.72 | 70.65 | 2.60  | 1176.58 | 1166.93 | 271.589  | 13.087  |  |
| 32 | 1182.36 | 72.12 | 1.57  | 1188.15 | 1176.58 | 313.219  | 8.764   |  |
| 33 | 1213.23 | 66.12 | 5.14  | 1220.94 | 1188.15 | 991.488  | 79.213  |  |
| 34 | 1246.02 | 62.59 | 12.69 | 1267.23 | 1232.51 | 1045.285 | 255.608 |  |
| 35 | 1278.81 | 74.28 | 13.07 | 1292.31 | 1267.23 | 461.621  | 146.755 |  |
| 36 | 1303.88 | 79.05 | 5.38  | 1307.74 | 1292.31 | 248.873  | 30.712  |  |
| 37 | 1311.59 | 81.12 | 3.66  | 1319.31 | 1307.74 | 188.722  | 22.962  |  |
| 38 | 1346.31 | 76.83 | 4.91  | 1352.10 | 1319.31 | 557.643  | 44.073  |  |
| 39 | 1365.60 | 66.84 | 13.70 | 1379.10 | 1352.10 | 670.755  | 145.263 |  |
| 40 | 1473.62 | 70.87 | 2.78  | 1481.33 | 1463.97 | 477.613  | 22.944  |  |
| 41 | 1489.05 | 71.09 | 4.41  | 1496.76 | 1485.19 | 287.516  | 21.827  |  |
| 42 | 1512.19 | 62.25 | 23.26 | 1533.41 | 1496.76 | 968.735  | 464.477 |  |
| 43 | 1564.27 | 73.10 | 5.35  | 1570.06 | 1556.55 | 330.846  | 46.795  |  |
| 44 | 1577.77 | 72.68 | 6.21  | 1583.56 | 1570.06 | 326.396  | 35.479  |  |
| 45 | 1589.34 | 77.41 | 6.93  | 1600.92 | 1583.56 | 319.748  | 72.766  |  |
| 46 | 1612.49 | 85.71 | 5.49  | 1622.13 | 1600.92 | 253.818  | 65.076  |  |
| 47 | 1649.14 | 86.10 | 2.08  | 1651.07 | 1645.28 | 75.726   | 7.591   |  |

VME6

03/08/2021 10:45:07

|    |         |       |       |         |         |          |         |  |
|----|---------|-------|-------|---------|---------|----------|---------|--|
| 48 | 1685.79 | 68.18 | 17.11 | 1701.22 | 1666.50 | 819.540  | 303.408 |  |
| 49 | 2017.54 | 84.90 | 1.69  | 2025.26 | 2004.04 | 300.110  | 15.012  |  |
| 50 | 2158.35 | 84.15 | 1.76  | 2166.06 | 2152.56 | 200.648  | 10.123  |  |
| 51 | 2347.37 | 83.11 | 1.31  | 2357.01 | 2339.65 | 280.203  | 9.910   |  |
| 52 | 2837.29 | 81.92 | 1.80  | 2862.36 | 2802.57 | 997.203  | 26.274  |  |
| 53 | 2962.66 | 80.81 | 1.45  | 2987.74 | 2945.30 | 789.224  | 34.225  |  |
| 54 | 3315.63 | 78.95 | 4.71  | 3342.64 | 3286.70 | 1011.433 | 96.394  |  |
| 55 | 3523.95 | 82.11 | 1.55  | 3533.59 | 3514.30 | 327.982  | 12.649  |  |
| 56 | 3649.32 | 82.31 | 1.30  | 3655.11 | 3645.46 | 164.255  | 5.868   |  |
| 57 | 3736.12 | 82.54 | 1.20  | 3743.83 | 3732.26 | 195.563  | 7.543   |  |
