# Supplementary material for: Quantum Computational Investigation of (E)-1-(4-methoxyphenyl)-5-methyl-N′-(3-phenoxybenzylidene)-1H-1,2,3-triazole-4-carbohydrazide
Source: MDPI journal article supplement (doi:10.3390/molecules27072193), 2022-03-28
Supplement: s1 [file s1]

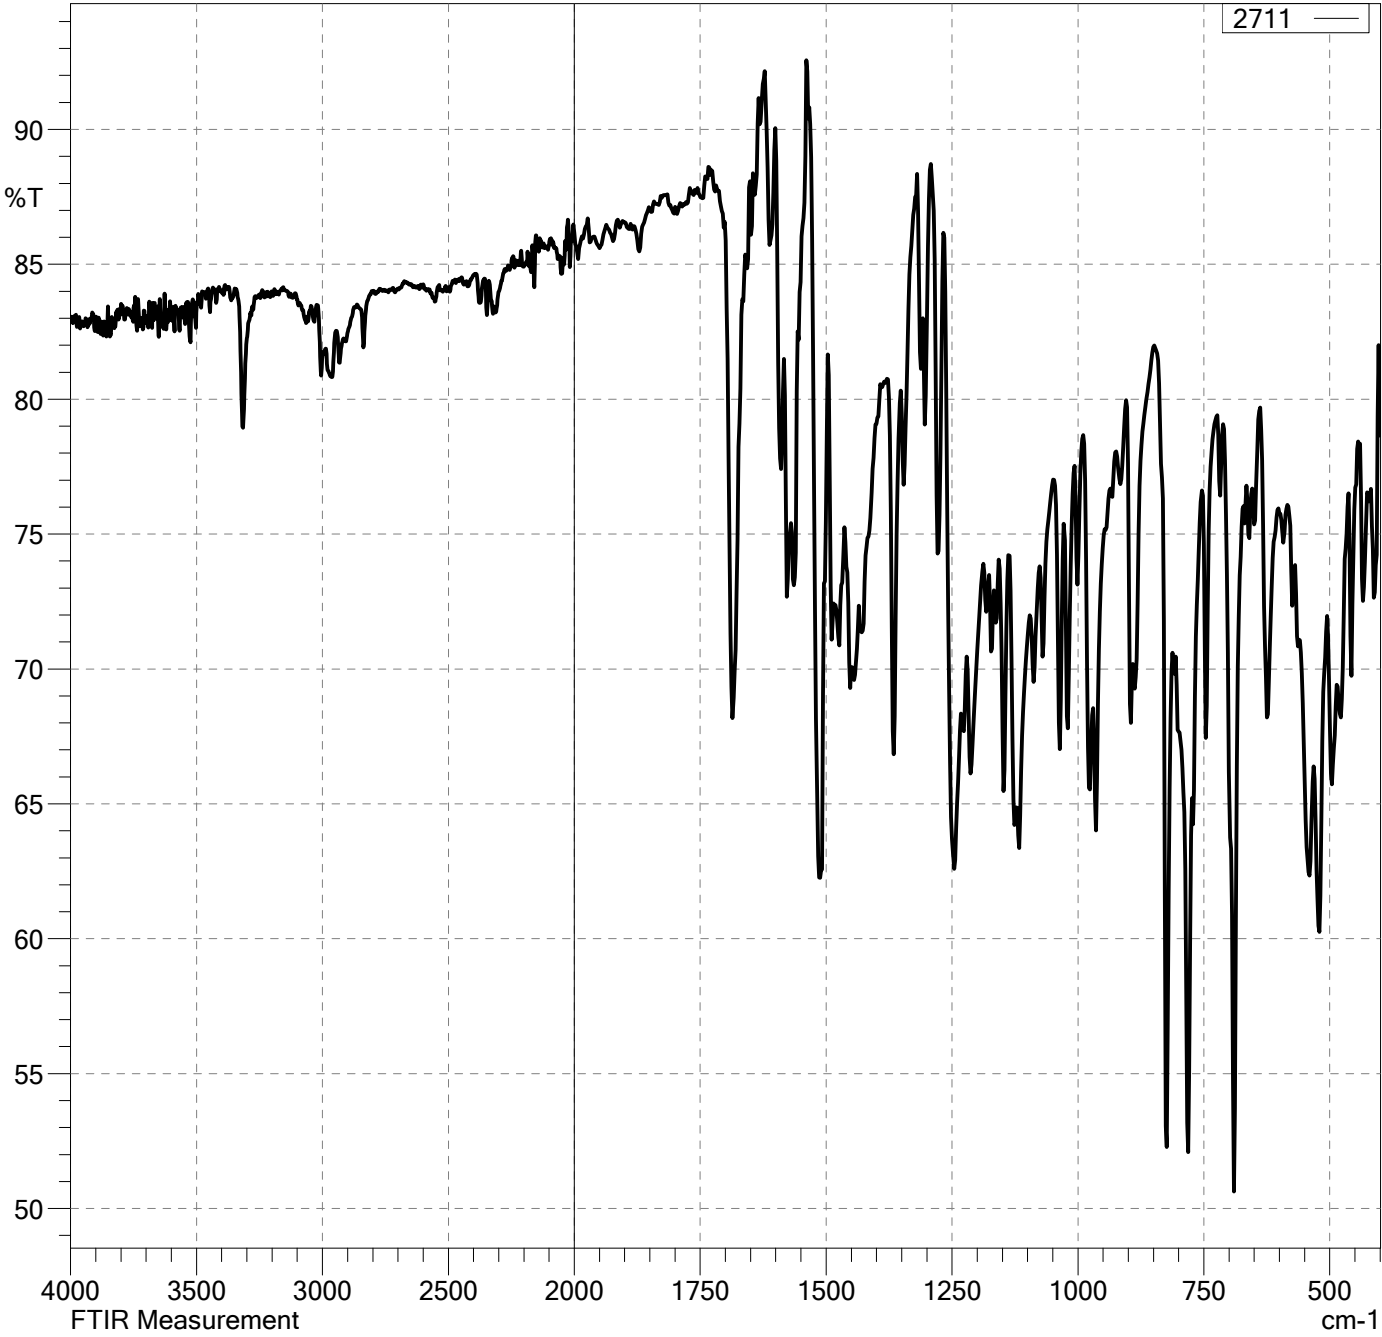

C:\Users\Shimadzu\Desktop\BK\140721\2711.ispd

FTIR Measurement

|   | Item           | Value          |
|---|----------------|----------------|
| 2 | Sample name    | gb             |
| 3 | Sample ID      | 271            |
| 4 | Option         |                |
| 5 | Intensity Mode | %Transmittance |
| 6 | Apodization    | Happ-Genzel    |
| 9 | No. of Scans   | 20             |

|    |            |                    |
|----|------------|--------------------|
| 10 | Resolution | 4 cm <sup>-1</sup> |
|----|------------|--------------------|
